# Supplementary material for: Changes in Retinal Function and Morphology Are Early Clinical Signs of Disease in Cattle with Bovine Spongiform Encephalopathy
Source: PubMed Central journal article supplement (PMC4355414; doi:10.1371/journal.pone.0119431), 2015-03-10
Supplement: pone.0119431.s001.pdf [file pone.0119431.s001.pdf]

| Classical | -20 dB<br>(milisec)<br>Baseline | -20 dB<br>(milisec)<br>12 MPI | 0 dB<br>(milisec)<br>Baseline | 0 dB<br>(milisec)<br>12 MPI | OCT (uM)<br>Baseline | OCT (uM)<br>12 MPI | Incubation<br>Time<br>(Months) | 23 bp<br>indel | 12 bp<br>indel |
|-----------|---------------------------------|-------------------------------|-------------------------------|-----------------------------|----------------------|--------------------|--------------------------------|----------------|----------------|
| 6825      | 37.3                            | 59.2                          | 25.4                          | 30.5                        |                      |                    | 21.0                           | +/-            | +/-            |
| 6826      | 54.8                            | 76.8                          | 24.8                          | 35.8                        | 255                  |                    | 17.8                           | -/-            | -/-            |
| 6830      | 63.3                            | 49.4                          | 35.8                          | 31.8                        | 306                  | 241                | 31.3                           | +/-            | +/-            |
| 6836      | 59.5                            | 67.3                          | 25.2                          | 39.5                        |                      |                    | 21.3                           | +/+            | +/+            |
| 6847      | 57.5                            | 61.3                          | 31.3                          | 25.3                        |                      |                    | 22.9                           | -/-            | -/-            |
| 6850      | 59.7                            | 61                            | 32.4                          | 37.0                        |                      |                    | 31.3                           | -/-            | -/-            |
| 6862      | 56.8                            | 65.8                          | 25.6                          | 34.3                        |                      |                    | 17.3                           | +/+            | +/+            |
| 6865      | 52.0                            | 63.2                          | 29.8                          | 32.3                        |                      |                    | 29.5                           | +/+            | +/+            |
| 6870      | 53.3                            | 61.8                          | 34.5                          | 49.0                        | 303                  | 232                | 17.6                           | +/-            | +/-            |
| 6877      | 55.7                            | 66.7                          | 24.5                          | 40.7                        |                      |                    | 23.8                           | +/-            | +/-            |
| 6992      | 54.2                            | 63                            | 24.3                          | 30.5                        |                      |                    | 21.3                           | +/+            | +/+            |
| 6864      |                                 |                               |                               |                             | 303                  | 246                | 17.9                           | -/-            | -/-            |
|           |                                 |                               |                               |                             |                      |                    |                                |                |                |
| Means     | 54.9                            | 63.2                          | 28.5                          | 35.1                        | 288.4                | 243.8              |                                |                |                |
|           |                                 |                               |                               |                             |                      |                    |                                |                |                |
| BSE-H     | -20 dB<br>(milisec)<br>Baseline | -20 dB<br>(milisec)<br>12 MPI | 0 dB<br>(milisec)<br>Baseline | 0 dB<br>(milisec)<br>12 MPI | OCT (uM)<br>Baseline | OCT (uM)<br>12 MPI | Incubation<br>Time<br>(Months) | 23 bp<br>indel | 12 bp<br>indel |
| 6873      | 52.3                            | 65.5                          | 28.3                          | 39                          |                      |                    | 17.7                           | -/-            | -/-            |
| 6874      | 59.6                            |                               | 29.3                          |                             |                      |                    | 16.8                           | +/-            | +/-            |
| 6880      | 59.1                            | 87                            | 27.9                          | 56.7                        | 326.0                | 264.7              | 16.3                           | -/-            | -/-            |
| 6881      | 49.8                            |                               | 25.0                          |                             | 260.8                | 230.6              | 17.0                           | -/-            | -/-            |
| 6911      | 50.33                           | 60.8                          | 24.5                          | 34.8                        | 317.7                | 265.8              | 17.0                           | +/+            | +/+            |
| 6912      | 49.4                            | 72.5                          | 23.7                          | 32.5                        |                      |                    | 17.0                           | +/-            | +/-            |
| 6913      | 50.3                            |                               | 21.9                          |                             |                      |                    | 16.8                           | +/-            | +/-            |
| 6973      | 54.0                            | 68.3                          | 23.5                          | 44.8                        | 328.8                | 321.5              | 17.7                           | +/+            | +/+            |
| 7012      | 47.2                            | 73.7                          | 24.3                          | 42.2                        | 320.3                | 280.2              | 17.7                           | -/-            | -/-            |
|           |                                 |                               |                               |                             |                      |                    |                                |                |                |
| Mean      | 52.7                            | 55.38                         | 25.4                          | 41.7                        | 302.2                | 272.8              |                                |                |                |

|                    | -20dB<br>Baseline | -20dB<br>12 MPI | 0dB<br>Baseline | 0dB<br>12 MPI | OCT<br>Baseline | OCT<br>12 MPI  |  |
|--------------------|-------------------|-----------------|-----------------|---------------|-----------------|----------------|--|
| Control Animals    |                   |                 |                 |               | 302.            |                |  |
|                    |                   |                 |                 |               | 290.            |                |  |
|                    |                   |                 |                 |               | 290.            |                |  |
|                    |                   |                 |                 |               | 295.            |                |  |
|                    |                   |                 |                 |               | 320.            |                |  |
|                    |                   |                 |                 |               | 286.            |                |  |
|                    |                   |                 |                 |               | 294.            |                |  |
|                    |                   |                 |                 |               | 268.            |                |  |
|                    |                   |                 |                 |               |                 |                |  |
| Pooled<br>Means    | 53.99<br>(1.3)    | 66.8<br>(2.0)   | 27.1<br>(0.9)   | 37.5<br>(1.9) | 303.4<br>(5.3)  | 259.9<br>(9.5) |  |
|                    |                   |                 |                 |               |                 |                |  |
| 95% CI             |                   | 61.8-70.3       |                 | 33.5-41.4     |                 | 238-282        |  |
|                    |                   |                 |                 |               |                 |                |  |
| False positives    | 1/19              |                 | 2/20            |               | 2/13            |                |  |
| Specificity        | 94.7%             |                 | 90%             |               | 84.6%           |                |  |
|                    |                   |                 |                 |               |                 |                |  |
| Positive positives |                   | 18/19           |                 | 16/17         |                 | 8/9            |  |
| Sensitivity        |                   | 94.7%           |                 | 94.1%         |                 | 88.9%          |  |

**Supplementary Table 1: Summary of Individual Animal Data.** Data for each animal includes baseline and 12 MPI values for ERG and OCT, incubation time and indel 12 and indel 23 genotype. Standard error for pooled means is in parenthesis. From the baseline and 12MPI data 95% CI was calculated and applied to each individual to estimate a specificity and sensitivity for this assay to detect BSE inoculated animals at 12 MPI.
